# Supplementary material for: Tissue clearing of both hard and soft tissue organs with the PEGASOS method
Source: PubMed Central journal article supplement (PMC6082844; doi:10.1038/s41422-018-0049-z), 2018-05-29
Supplement: 41422_2018_49_MOESM12_ESM.pdf [file 41422_2018_49_MOESM12_ESM.pdf]

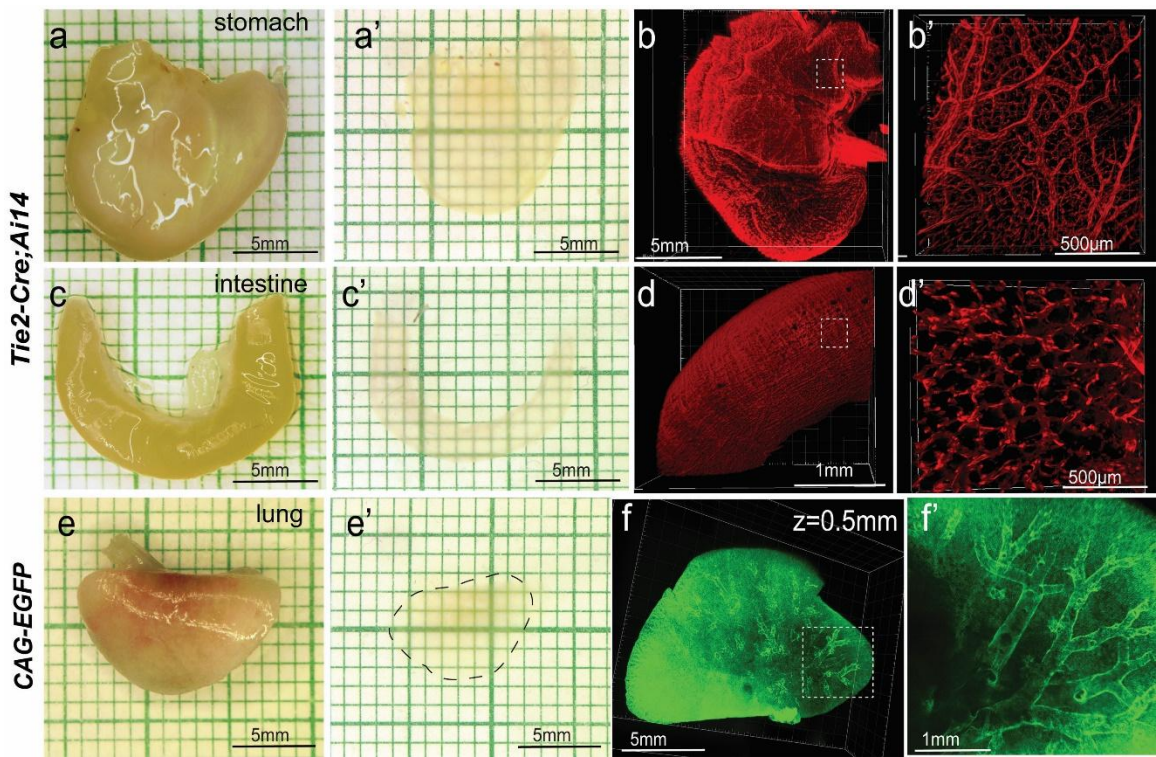

**Figure S3. PEGASOS passive immersion procedure enables soft tissue organs clearing and imaging.** Samples were harvested from adult mice (60 days age) of *Tie2-Cre;Ai14* or *CAG-EGFP* and processed following the passive immersion procedure. (a). Intact stomach of a *Tie2-Cre;Ai14* mouse was imaged before (a) and after clearing (a'). (b). The cleared stomach was imaged with a confocal microscope. Boxed area is enlarged in (b') to show the vascular organization. (c). A segment of intestine was cleared to complete transparency (c') and then imaged with a confocal microscope (d). Boxed area is enlarged in (d') to display the vascular network. (e). An intact lung from a *CAG-EGFP* mouse was cleared (e') and imaged (f). Boxed region is enlarged to display the branchial organization (f').
