# Supplementary material for: Tissue clearing of both hard and soft tissue organs with the PEGASOS method
Source: PubMed Central journal article supplement (PMC6082844; doi:10.1038/s41422-018-0049-z), 2018-05-29
Supplement: 41422_2018_49_MOESM13_ESM.pdf [file 41422_2018_49_MOESM13_ESM.pdf]

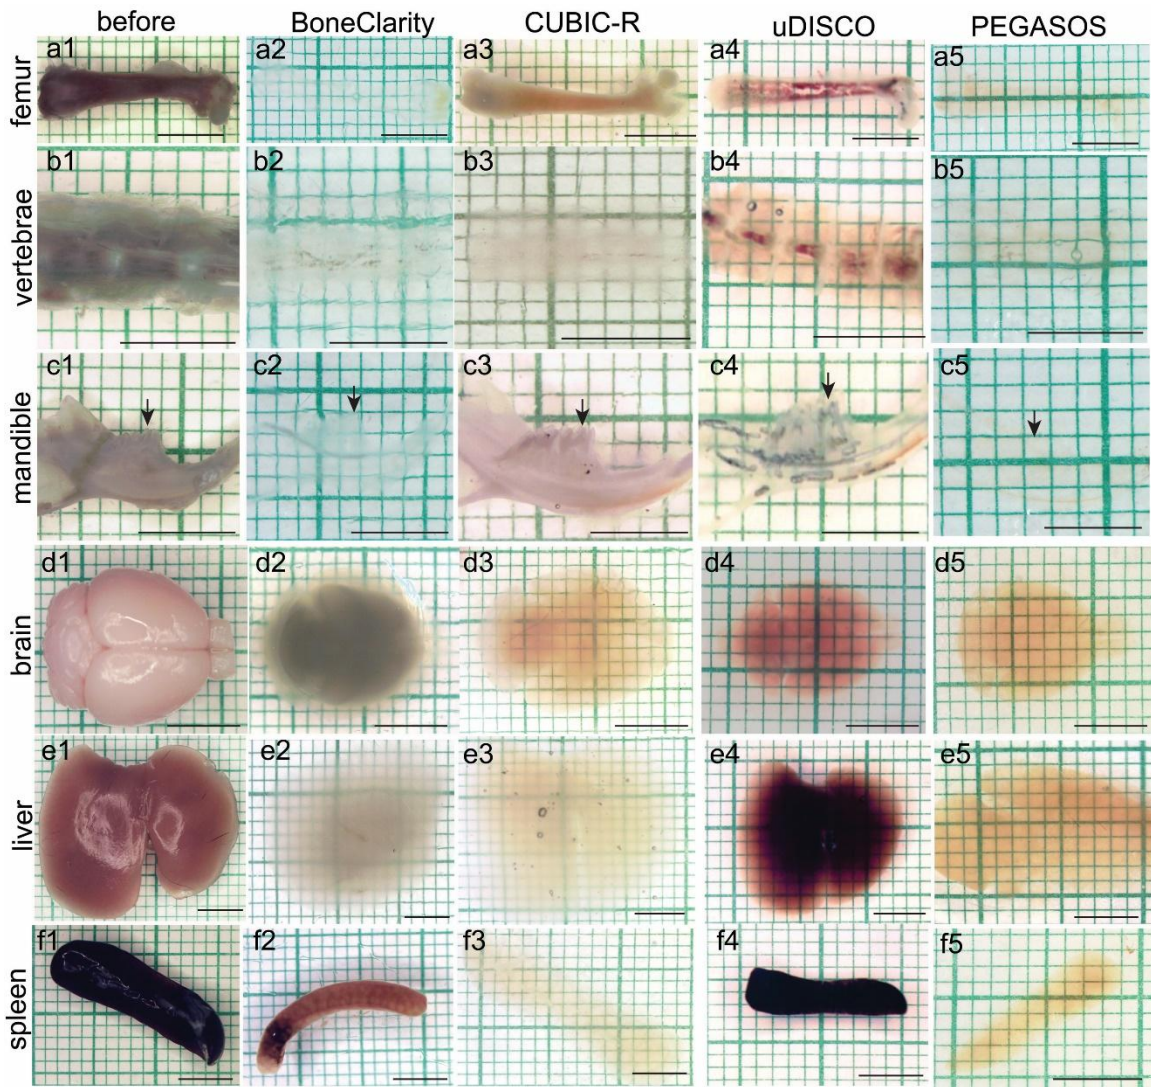

**Figure S4. Comparison of clearing performance between the PEGASOS and other clearing methods.** Hard and soft tissue samples were harvested from adult C57BL/6 mice (P60) and processed following BoneCLARITY, CUBIC-R, uDISCO or PEGASOS passive immersion method<sup>9,15,16</sup>. Representative images were taken. Arrows in c1 to c5 indicate the mandibular first molar. Scale bars, 5mm.
