# Supplementary material for: Tissue clearing of both hard and soft tissue organs with the PEGASOS method
Source: PubMed Central journal article supplement (PMC6082844; doi:10.1038/s41422-018-0049-z), 2018-05-29
Supplement: 41422_2018_49_MOESM14_ESM.pdf [file 41422_2018_49_MOESM14_ESM.pdf]

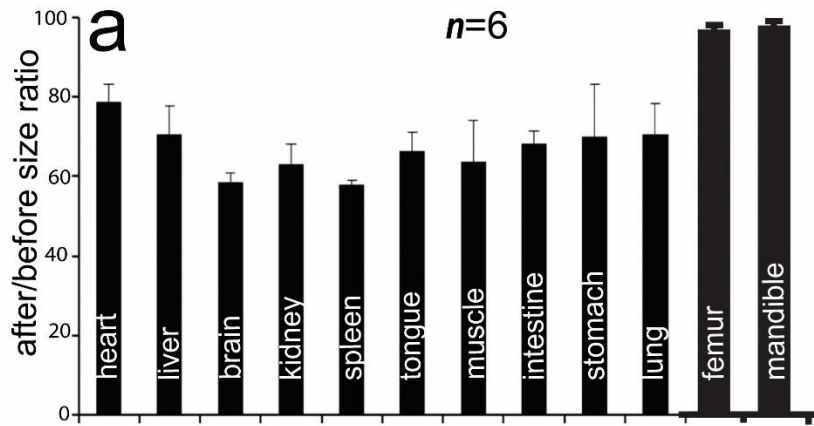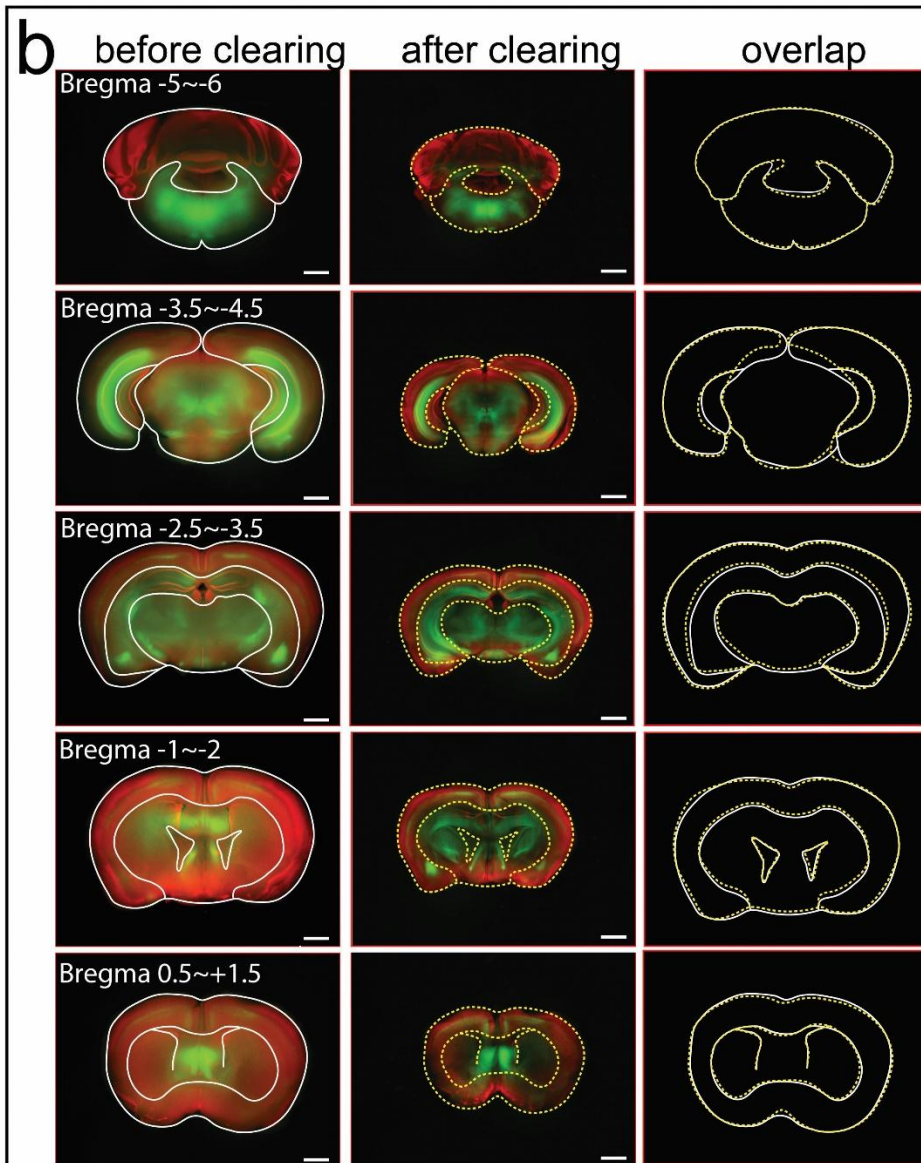

**Figure S5. Size change of organs after clearing. (a).** Size change of various organs after clearing with PEGASOS passive immersion procedure. n=6. **(b).** Brain Shrinkage is anisotropic. Coronal brain slices of 2mm thickness were harvested from *Thy1-EGFP* mice (60 days of age) at different levels and stained with propidium iodide. Sections were then imaged with a fluorescence stereomicroscope before and after PEGASOS clearing. The borders of major structures before and after clearing are highlighted in solid or broken lines respectively. The after-clearing border lines are ratio-metricly enlarged to compare with the before-clearing borders and they showed overlap. Scale bars, 1mm.
