# Supplementary material for: Tissue clearing of both hard and soft tissue organs with the PEGASOS method
Source: PubMed Central journal article supplement (PMC6082844; doi:10.1038/s41422-018-0049-z), 2018-05-29
Supplement: 41422_2018_49_MOESM15_ESM.pdf [file 41422_2018_49_MOESM15_ESM.pdf]

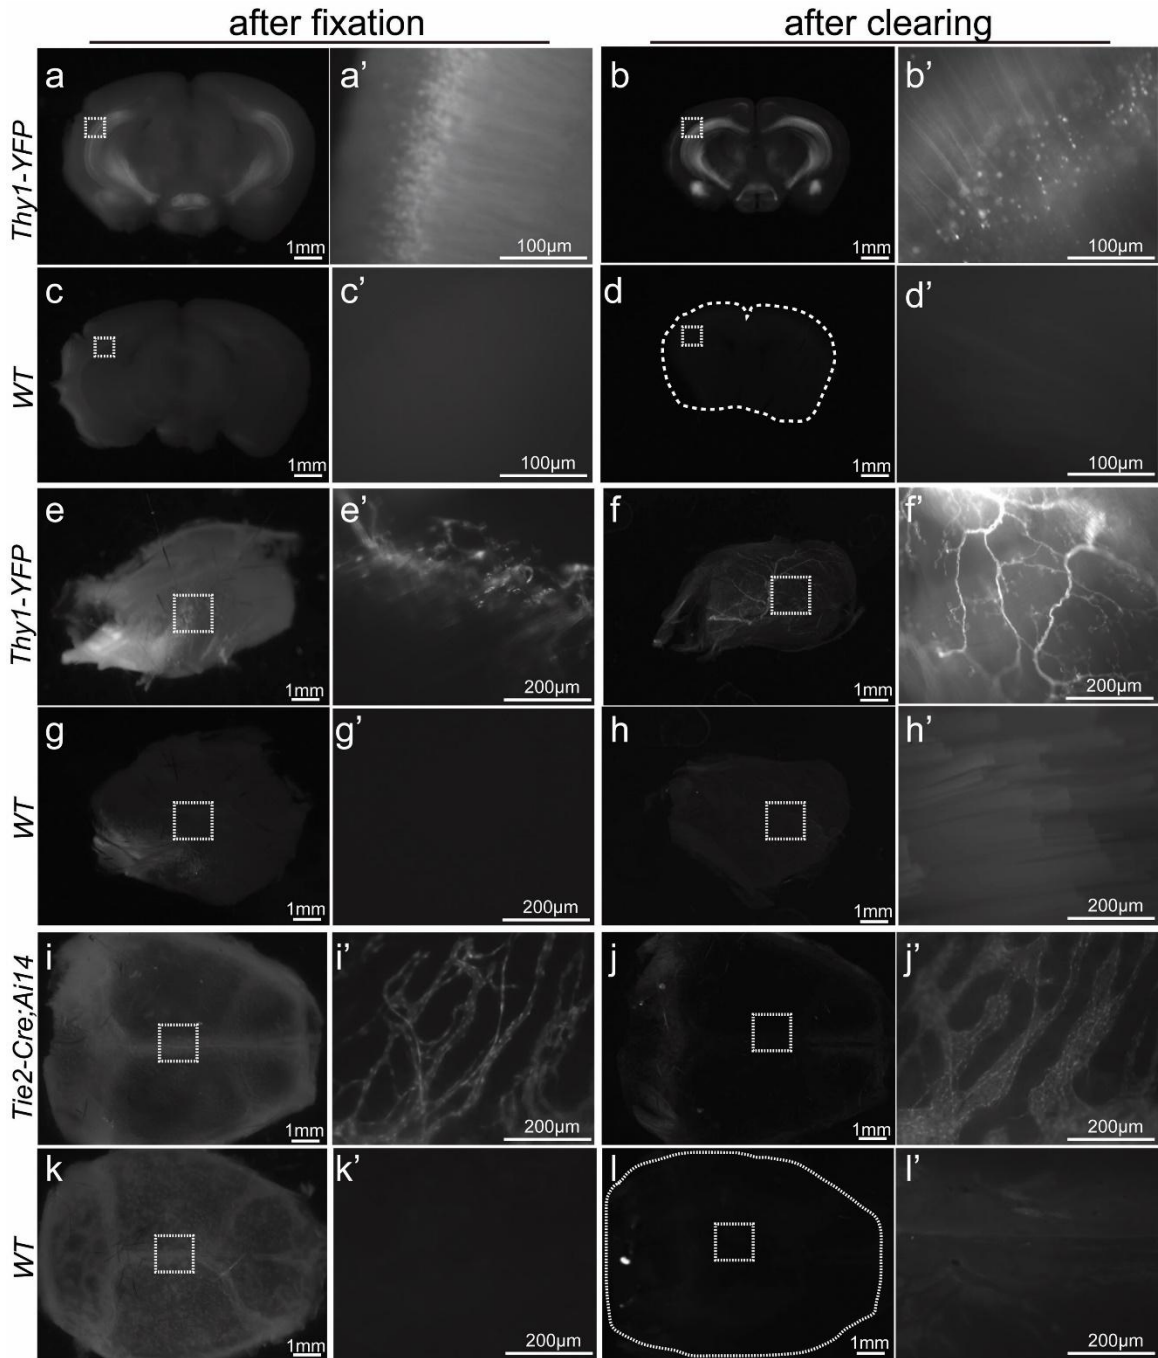

**Figure S6. Effects of PEGASOS clearing on the autofluorescence intensities of various types of tissue.** (a-d). Brain slices (2mm thickness) were harvested from *Thy1-YFP-H* mice or *C57 Bl/6* mice (2 months age). (e-h). Masseter muscles (~1mm thickness) were dissected from *Thy1-YFP-H* mice or *C57 Bl/6* mice (2 months age). (i-l). Calvarial bones were harvested from *Tie2-Cre;Ai14* or *C57 Bl/6* mice (2 months age). Tissues were processed following the passive immersion procedure. Images were acquired with a stereo fluorescent microscope after fixation or after clearing. Comparable imaging parameters were used for all samples. (a'-l'). Boxed areas in the left panels were re-imaged at higher magnification. Dotted lines outline the nearly invisible brain slice (d) or calvarial bone (l).
