# Supplementary material for: Tissue clearing of both hard and soft tissue organs with the PEGASOS method
Source: PubMed Central journal article supplement (PMC6082844; doi:10.1038/s41422-018-0049-z), 2018-05-29
Supplement: 41422_2018_49_MOESM17_ESM.pdf [file 41422_2018_49_MOESM17_ESM.pdf]

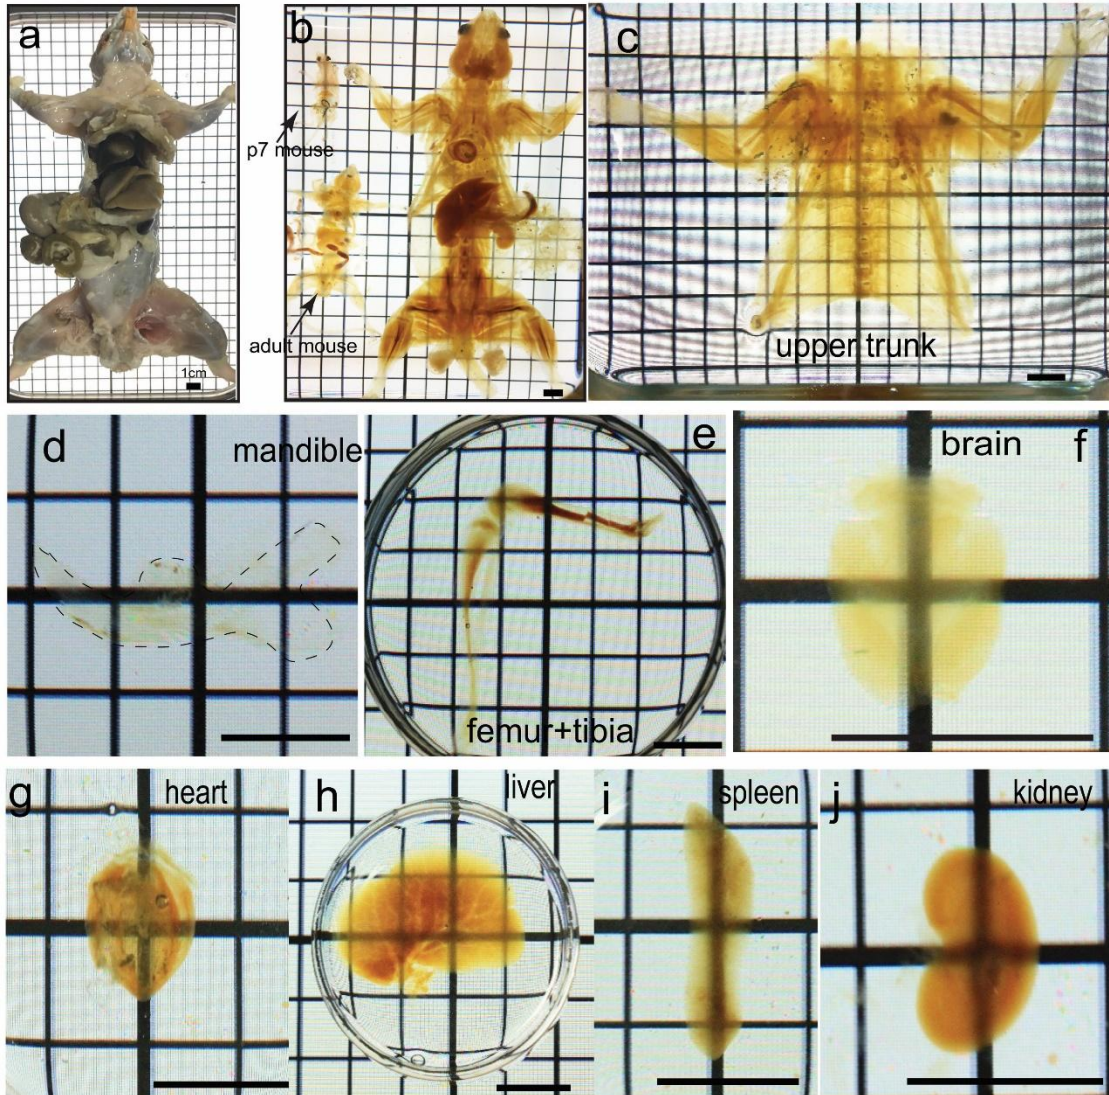

**Figure S8. PEGASOS recirculation procedure can be scaled up for clearing adult rat. (a, b).** Adult rat of 12 weeks age before **(a)** and after **(b)** clearing following the PEGASOS recirculation procedure. An adult (6 weeks age) mouse and a pup (p7) mouse were placed on the left as the size controls after clearing. **(c-j).** Body parts and organs were dissected and imaged. Dotted lines outline the nearly invisible mandible within the BB-PEG clearing medium. Scale Bars, 1cm.
