# Supplementary material for: Tissue clearing of both hard and soft tissue organs with the PEGASOS method
Source: PubMed Central journal article supplement (PMC6082844; doi:10.1038/s41422-018-0049-z), 2018-05-29
Supplement: 41422_2018_49_MOESM18_ESM.pdf [file 41422_2018_49_MOESM18_ESM.pdf]

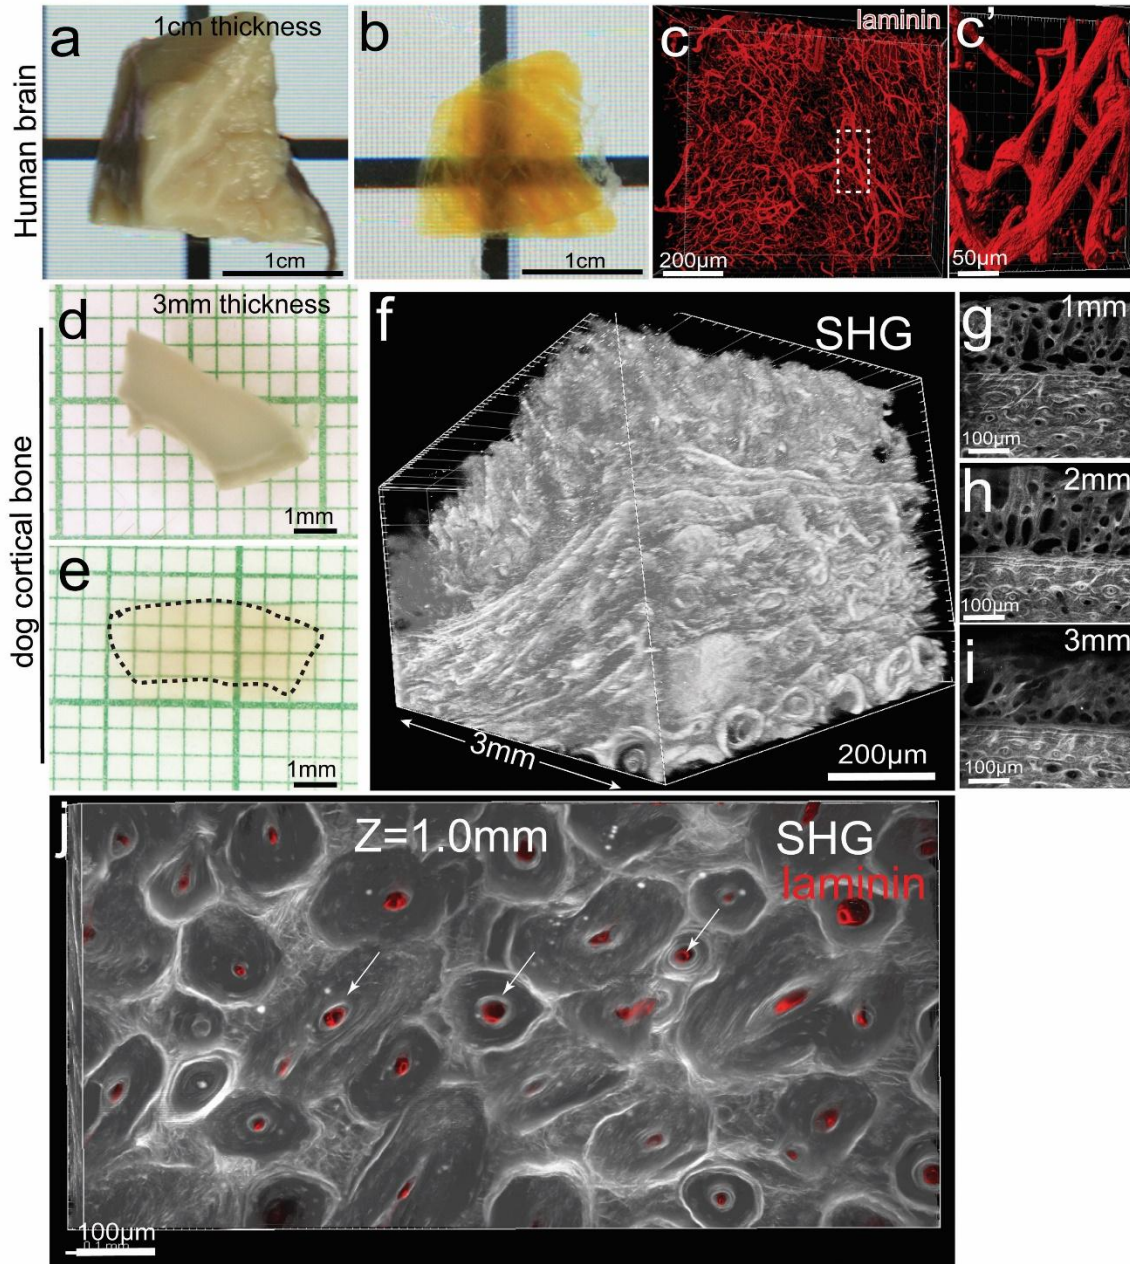

**Figure S9. The PEGASOS passive immersion procedure can be scaled up for clearing large tissue samples including human brain and dog bone. (a).** Fixed human brain sample was cleared following the passive immersion procedure and achieved transparency **(b)**. **(c)**. A slice of human brain sample (1mm thickness) was stained with anti-laminin antibody and imaged after clearing. Boxed region is enlarged in **c'** to show the vascular organization. **(d)**. A bone piece (7mm X 3mm X 3mm) harvested from dog tibia was cleared to achieve transparency **(e)**. Cleared dog bone was imaged with a two-photon microscope and an image stack is displayed. Optical sections acquired at different depth are shown in panels **(g)**, **(h)** and **(i)**. **(j)**. The anti-laminin antibody staining followed by clearing reveals the Haversian Canals (arrows) located in the center of the osteon. SHG, Second harmonic generation signal.
