# Supplementary material for: Tissue clearing of both hard and soft tissue organs with the PEGASOS method
Source: PubMed Central journal article supplement (PMC6082844; doi:10.1038/s41422-018-0049-z), 2018-05-29
Supplement: 41422_2018_49_MOESM19_ESM.pdf [file 41422_2018_49_MOESM19_ESM.pdf]

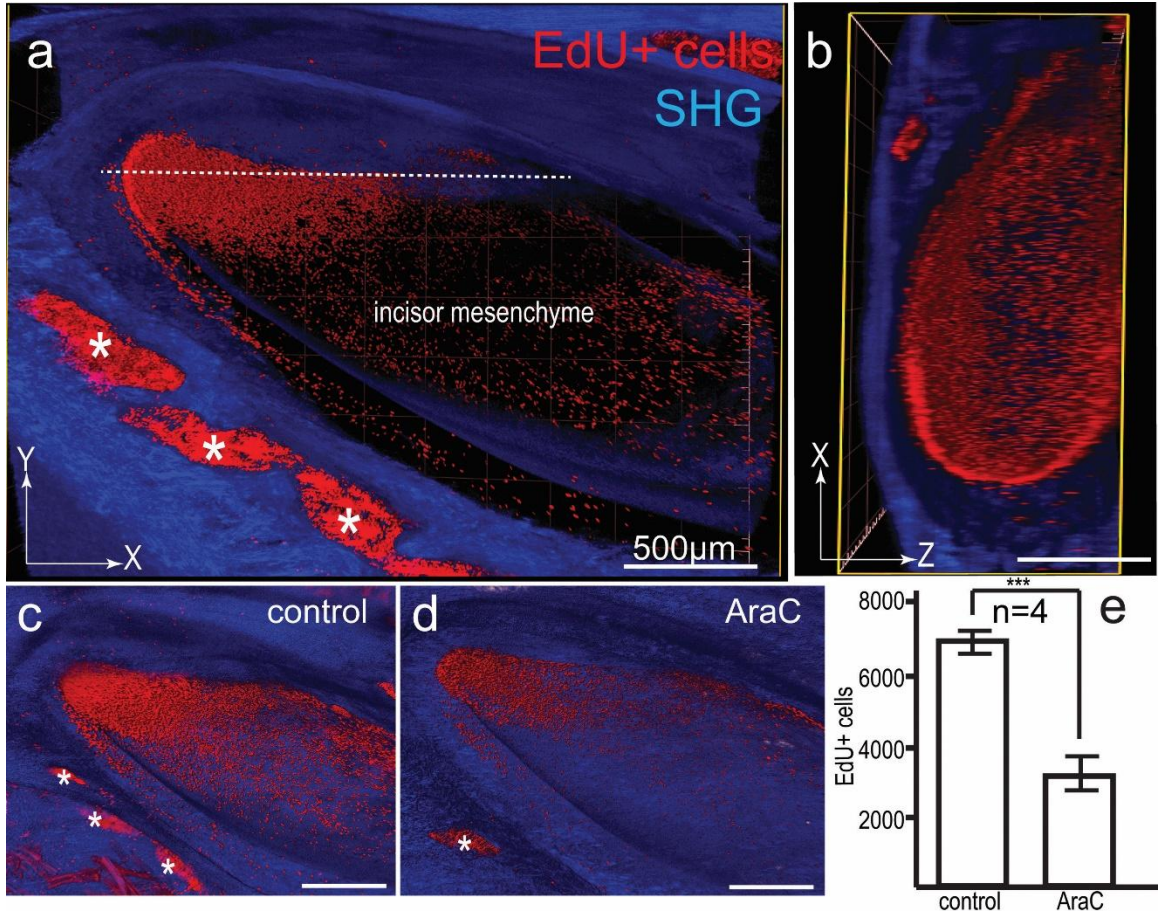

**Figure S10. Cytosine arabinoside (Ara-C) treatment reduced the number of transit amplifier cells (TA cells) within the mouse incisor.** EdU was injected to adult mice two hours before sacrifice. The mandibles were processed for whole mount EdU staining and clearing. Samples were imaged with a 10X objective on a two-photon microscope. **(a)**. XY stack was acquired to display the EdU+ cells within the incisor mesenchyme and bone marrow (asterisks). **(b)**. XZ slice was acquired. The location was indicated with dotted line in **(a)**. Adult mice were injected with either PBS (control) or AraC for two weeks and processed as described above. 3-D images were acquired for control incisor **(c)** and AraC treated incisor **(d)**. Results were quantified in **(e)**. All values are mean  $\pm$  s.d., SHG, Second harmonic generation signal. Statistical significance (\*\*\*,  $P < 0.001$ ) was assessed by Student *t-test*. Scale bars, 500 $\mu$ m.
