# Supplementary material for: Tissue clearing of both hard and soft tissue organs with the PEGASOS method
Source: PubMed Central journal article supplement (PMC6082844; doi:10.1038/s41422-018-0049-z), 2018-05-29
Supplement: 41422_2018_49_MOESM20_ESM.pdf [file 41422_2018_49_MOESM20_ESM.pdf]

**Table S1.** PEGASOS immersion method time schedule.

|                 |                   | Soft tissue organs                   | Hard tissue                             | Tissue slices |                          |
|-----------------|-------------------|--------------------------------------|-----------------------------------------|---------------|--------------------------|
| decalcification | 20% EDTA          | none                                 | 4 days with daily change                | none          | 37°C<br>in the<br>shaker |
| decolorization  | 25% Quadrol       | 2 days with daily change             | 2 days with daily change                | 1 day         |                          |
|                 | Ammonium solution | 6 hours for heavily colorized organs | 6 hours for heavily colorized long bone | none          |                          |
| delipidation    | 30% tert-butanol  | 4 hours                              | 4 hours                                 | 2 hours       |                          |
|                 | 50% tert-butanol  | 6 hours                              | 6 hours                                 | 4 hours       |                          |
|                 | 70% tert-butanol  | 1 days                               | 1 days                                  | 4 hours       |                          |
| dehydration     | tB-PEG            | 2 days with daily change             | 2 days with daily change                | 1 day         |                          |
| Clearing        | BB-PEG            | 1 day                                | 1 day                                   | 0.5 day       |                          |
| Total time      |                   | 6-7 days                             | 11-12 days                              | 3-4 days      |                          |
