# Supplementary material for: Tissue clearing of both hard and soft tissue organs with the PEGASOS method
Source: PubMed Central journal article supplement (PMC6082844; doi:10.1038/s41422-018-0049-z), 2018-05-29
Supplement: 41422_2018_49_MOESM21_ESM.pdf [file 41422_2018_49_MOESM21_ESM.pdf]

## Supplementary information, Data S1.

### PEGASOS passive immersion protocol for clearing adult mice organs

#### Materials:

Quadrol; Sigma-Aldrich; 122262

Tert-Butanol; Sigma-Aldrich; 471712

PEG-MMA500; Sigma-Aldrich; 447943

Benzyl Benzoate; Sigma-Aldrich; B6630

EDTA (Ethylenediaminetetraacetic acid disodium salt dehydrate); Sigma-Aldrich; E5134

Glass vials or 50ml conical tubes

#### Solutions:

0.5M EDTA (pH=7.0-7.5)

25% w/v Quadrol solution (Quadrol is very vicious and weighing is easier)

3% ammonium solution

30% v/v tert-Butanol + 3% w/v Quadrol

50% v/v tert-Butanol + 3% w/v Quadrol

70% v/v tert-Butanol + 3% w/v Quadrol

[70% v/v tert-Butanol + 30% v/v PEG-MMA-500] + 3% w/v Quadrol

BB-PEG clearing solution (**R.I.** 1.543): [75% v/v Benzyl Benzoate + 25% v/v PEG-MMA-500] + 3% w/v Quadrol

#### Procedures:

Samples can be placed in 50ml conical tubes for treatment in each step.

1. Perfusion to sacrifice mice and harvest samples: transcardiac perfuse with PBS and then 4% PFA to wash away as much blood as possible.  
The indication of a successful transcardiac perfusion is the liver turning pale.
2. Fixation: fix samples with 4%PFA at 4 °C overnight.
3. Decalcification: (for hard tissue only)  
Immerse samples in 0.5M EDTA and place in 37 °C shaker (~100rpm) for 2-4 days with daily medium change. The duration of decalcification depends on the size of the bone. Usually adult mouse femur or mandible requires 4 days for complete decalcification.
4. Decolorization:
  - Place whole organs into 25% Quadrol for 1-2 days at 37 °C under constant shaking (~100 rpm).
  - Refresh medium daily.
  - (optional) 3% ammonium solution 6 hours for heavily colorized samples that were not perfused.
5. (Optional) Whole mount immunofluorescent staining of samples.
6. Delipidation and dehydration will be performed in 37 °C shaker (~100rpm). See table below for recommended duration for each step.
  - a. 30% tert-Butanol + 3% Quadrol
  - b. 50% tert-Butanol + 3% Quadrol
  - c. 70% tert-Butanol + 3% Quadrol

d. [70% tert-Butanol + 30% PEG-MMA-500]+ 3% Quardol

7. Clearing:

Briefly rinse the sample with the BB-PEG clearing medium and then immerse and shake it at 37 °C (~100rpm) until transparency is reached.

Tip: Freshly made BB-PEG solution is colorless and turns slightly yellowish after exposing in air. Somehow, we noticed BB-PEG exposed in air for 12 hours achieved better transparency than fresh BB-PEG.

Optimal duration for processing samples of different tissue types and size should be determined by experiments. The following table provides recommended time for different samples.

|                 |                      | Soft tissue organs<br>(adult brain)        | Hard tissue<br>(adult mouse<br>femur)         | Tissue<br>Slices (brain<br>slice of 1-<br>2mm<br>thickness) |                           |
|-----------------|----------------------|--------------------------------------------|-----------------------------------------------|-------------------------------------------------------------|---------------------------|
| decalcification | 0.5M EDTA            | none                                       | 4 days with daily<br>change                   | none                                                        | 37 °C<br>in the<br>shaker |
| decolorization  | 25% Quadrol          | 2 days<br>with daily change                | 2 days<br>with daily change                   | 1 day                                                       |                           |
|                 | Ammonium<br>solution | 6 hours for<br>heavily colorized<br>organs | 6 hours for<br>heavily colorized<br>long bone | none                                                        |                           |
| delipidation    | 30% tert-<br>butanol | 4 hours                                    | 4 hours                                       | 2 hours                                                     |                           |
|                 | 50% tert-<br>butanol | 6 hours                                    | 6 hours                                       | 4 hours                                                     |                           |
|                 | 70% tert-<br>butanol | 1 days                                     | 1 days                                        | 4 hours                                                     |                           |
| dehydration     | tB-PEG               | 2 days<br>with daily change                | 2 days<br>with daily change                   | 1 day                                                       |                           |
| Clearing        | BB-PEG               | 1 day                                      | 1 day                                         | 0.5 day                                                     |                           |
| Total time      |                      | 6-7 days                                   | 11-12 days                                    | 3-4 days                                                    |                           |

8. Storage: Samples can then be preserved in the clearing medium covered with aluminum foil at room temperature for a long term.
