# Supplementary material for: Tissue clearing of both hard and soft tissue organs with the PEGASOS method
Source: PubMed Central journal article supplement (PMC6082844; doi:10.1038/s41422-018-0049-z), 2018-05-29
Supplement: 41422_2018_49_MOESM22_ESM.pdf [file 41422_2018_49_MOESM22_ESM.pdf]

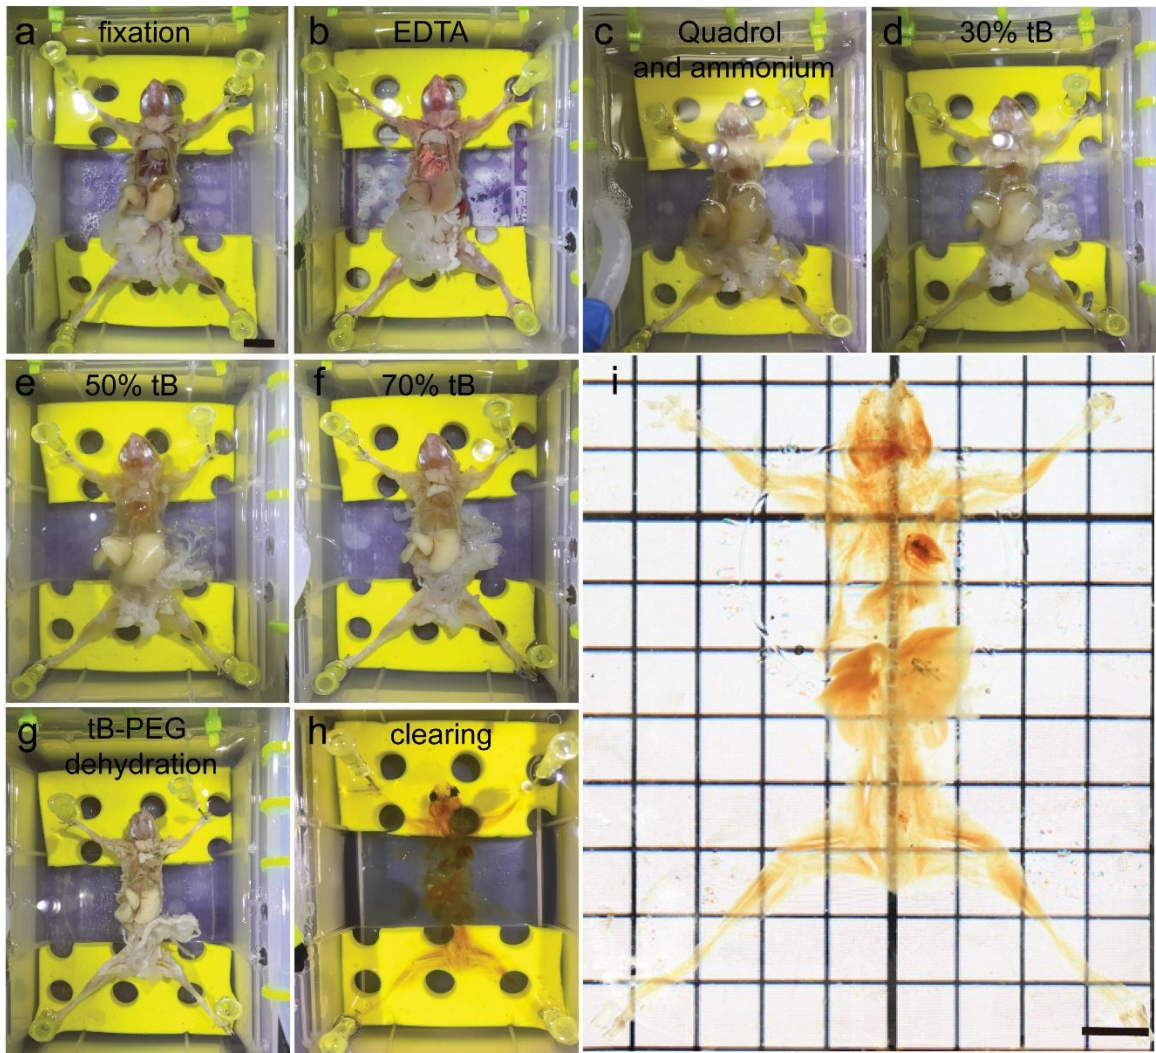

**Figure S1. Clearing of adult *whole* mouse following the PEGASOS full body recirculation procedure.** *C57BL/6* mouse of 2 months age was processed following the full body recirculation procedure. Images were acquired after fixation (a), EDTA decalcification (b), quadrol and ammonium decolorization (c), delipidation with 30% tB (d), 50% tB (e) and 70% tB (f), dehydration with tB-PEG (g) and clearing (h). Eyeballs were removed and the mouse was placed on illuminated background for imaging (i). Scale bars, 1cm.
